# Supplementary material for: Pyruvate kinase M2 regulates photoreceptor structure, function, and viability
Source: PubMed Central journal article supplement (PMC5833680; doi:10.1038/s41419-018-0296-4), 2018-02-14
Supplement: 41419_2018_296_MOESM2_ESM.pdf [file 41419_2018_296_MOESM2_ESM.pdf]

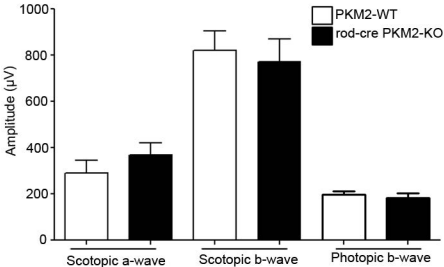

Figure S1

cGMP/DAPI

cGMP/DAPI

(-Ab)

A

ONL

OPL

IPL

B

C

PKM2-WT

rod-cre PKM2-KO

rod-cre PKM2-KO

Figure S2

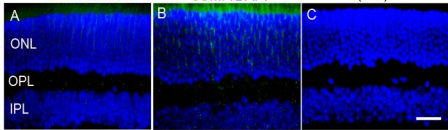

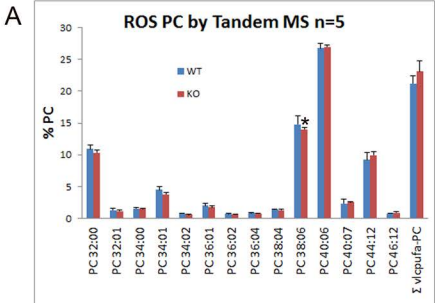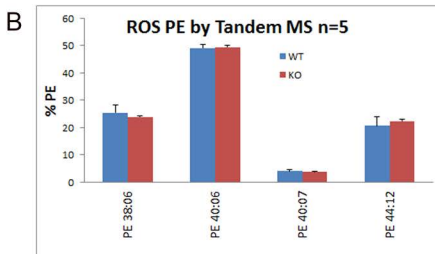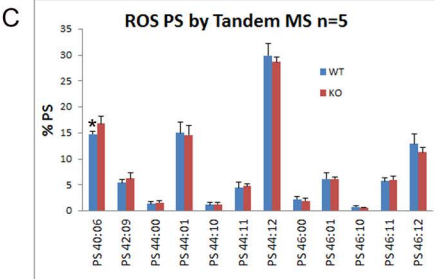

Figure S3
